## Correction

**Correction for: Correction for: *Sod2* haploinsufficiency does not accelerate aging of telomere dysfunctional mice****Luis Miguel Guachalla<sup>1,2</sup>, Zhenyu Ju<sup>1,5</sup>, Rafal Koziel<sup>3</sup>, Guido von Figura<sup>1,4</sup>, Zhangfa Song<sup>1</sup>, Markus Fusser<sup>6</sup>, Bernd Epe<sup>6</sup>, Pidder Jansen-Dürr<sup>3</sup>, K. Lenhard Rudolph<sup>1</sup>**

<sup>1</sup> Institute of Molecular Medicine and Max-Planck-Research-Group on Stem Cell Aging, University of Ulm, 89081 Ulm, Germany

<sup>2</sup> International MD/PhD Program, Medical School Hannover, Hannover, Germany

<sup>3</sup> Institute for Biomedical Aging Research, Austrian Academy of Sciences, A-6020 Innsbruck, Austria

<sup>4</sup> Department of Internal Medicine I, University of Ulm, Ulm, Germany

<sup>5</sup> Institute of Laboratory Animal Sciences and Max-Planck-Partner Group on Stem Cell Aging, Chinese Academy of Medical Sciences, Beijing, China

<sup>6</sup> Institute of Pharmacy, University of Mainz, D-55099 Mainz, Germany

**Correspondence to:** K. Lenhard Rudolph; **email:** [Lenhard.Rudolph@uni-ulm.de](mailto:Lenhard.Rudolph@uni-ulm.de)

**Original article:** [Aging \(Albany NY\) 2009; 1: 303-315.](#)

PMID: 20195488

PMCID: PMC2830048

doi: [10.18632/aging.100030](https://doi.org/10.18632/aging.100030)

**This article has been corrected:** The authors requested to replace panel C in Supplementary Figure 2. In Supplementary Figure 2C-E the errors occurred in p-value calculation and n-number depiction. Supplementary Figure 2C contained 4 outliers (Grubb's test) but only 1 was removed for p-value calculation. The corrected Supplementary Figure 2C is shown below and indicates the outliers in green as well as the corrected p-values. In Supplementary Figure 2E the p-value for the comparison of *Sod2*<sup>+/+</sup>, *G3mTerc*<sup>-/-</sup> mice versus *Sod2*<sup>+/+</sup>, *G3mTerc*<sup>-/-</sup> mice should read p=0.12 instead of p=0.77. N-numbers for Suppl. Fig. 2C-E were 16-17 for *Sod2*<sup>+/+</sup>, *G3mTerc*<sup>-/-</sup> mice, 14-16 for *Sod2*<sup>+/+</sup>, *G3mTerc*<sup>-/-</sup> mice, 7-8 for *Sod2*<sup>+/+</sup>, *mTerc*<sup>+/+</sup> mice, 12-14 for *Sod2*<sup>+/+</sup>, *mTerc*<sup>+/+</sup> mice, and 4-5 for young wildtype (yWT) mice. Aging markers were determined as previously described (Reference 16 of the manuscript). Statistical analysis was performed using the unpaired t-test with GraphPad Prism software. These corrections do not change any of the conclusions of the publication. The corrected panel C of Supplementary Figure 2 is provided below.

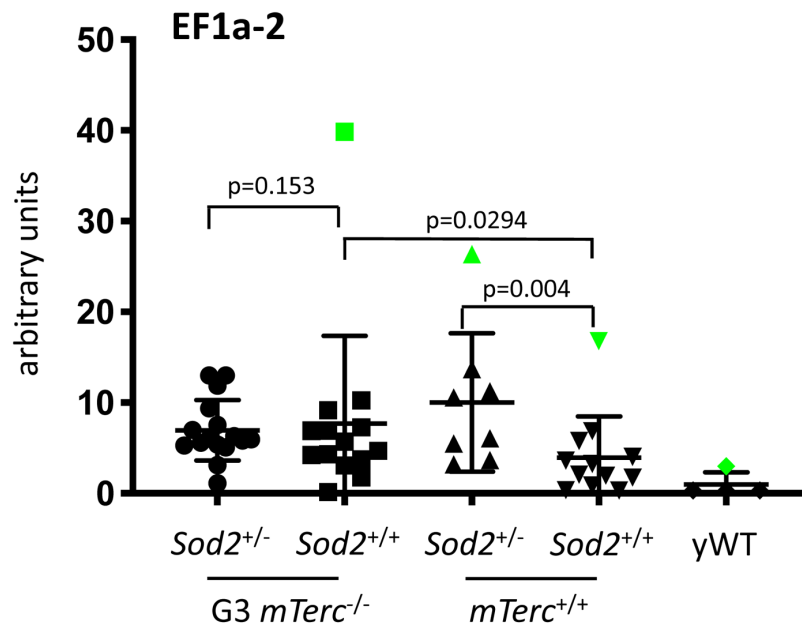

Supplementary Figure 2C.
